# Supplementary material for: Poly(2-oxazoline)s with pendant cubane groups
Source: Royal Society of Chemistry journal article supplement (doi:10.1039/c8py01037d), 2018-01-01
Supplement: c8py01037d1.pdf [file c8py01037d1.pdf]

## Supporting Information

### Poly(2-oxazoline)s with Pendant Cubane Groups

Mathias Glassner<sup>\*a</sup>, Bart Verbraeken<sup>a</sup>, Valentin Victor Jerca<sup>a,b</sup>, Kristof Van Hecke<sup>c</sup>, John Tsanaktsidis<sup>d</sup> and Richard Hoogenboom<sup>\*a</sup>

<sup>a</sup>Supramolecular Chemistry Group, Centre of Macromolecular Chemistry (CMaC), Department of Organic and Macromolecular Chemistry, Ghent University, Krijgslaan 281-S4, 9000 Ghent, Belgium. E-mail: Mathias.Glassner@ugent.be, Richard.Hoogenboom@ugent.be

<sup>b</sup>Centre of Organic Chemistry “Costin D. Nenitzescu”, Romanian Academy, Spl. Independentei 202B, 060023, Bucharest, Romania

<sup>c</sup>XStruct, Department of Chemistry, Ghent University, Krijgslaan 281-S3, B-9000, Ghent, Belgium

<sup>d</sup>Ian Wark Laboratory, CSIRO Manufacturing Flagship, Bayview Avenue, Clayton, Victoria 3168, Australia

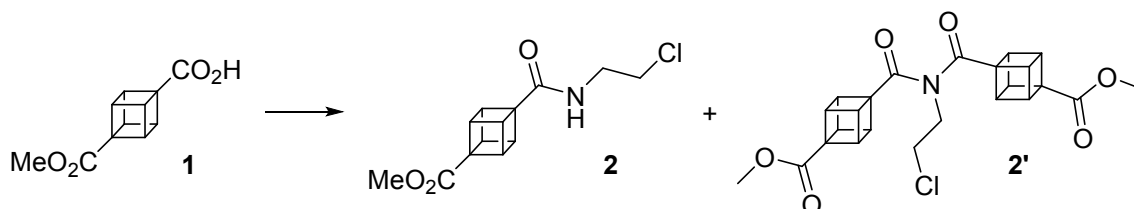

**Scheme S1** Synthesis of compound **2** including the formation of the side-product **2'**.

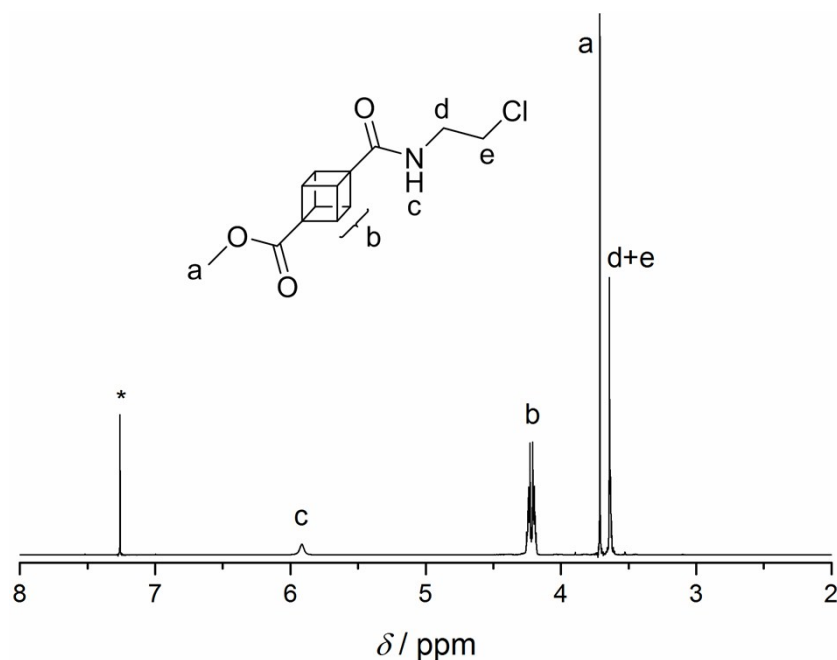

**Figure S1** <sup>1</sup>H NMR spectrum of methyl 4-((2-chloroethyl)carbamoyl)cubane-1-carboxylate (**2**) in CDCl<sub>3</sub>.

\* = CHCl<sub>3</sub>

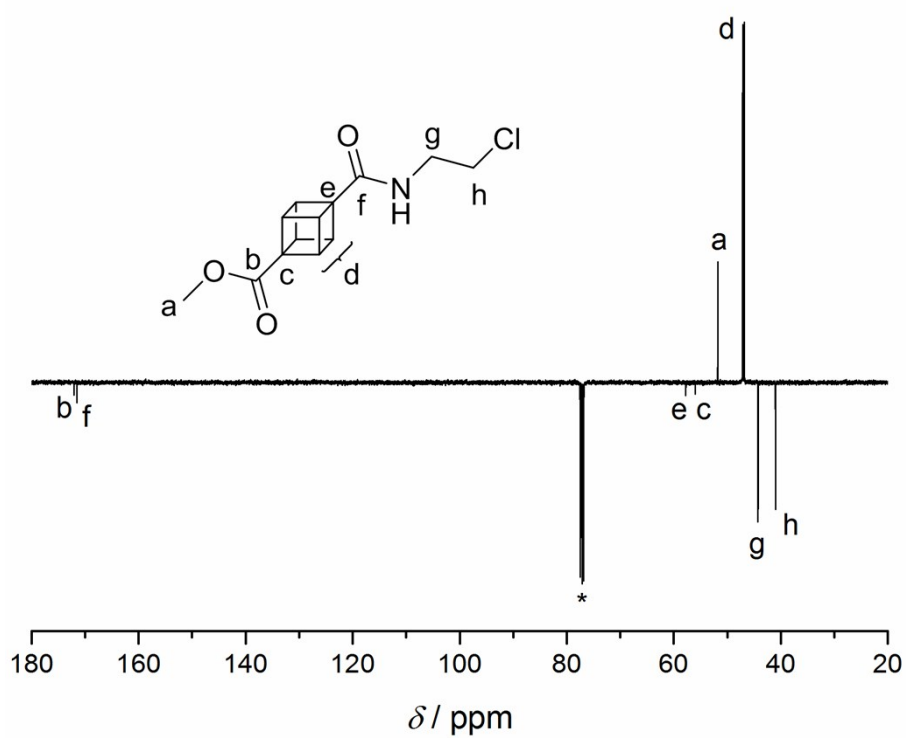

**Figure S2** <sup>13</sup>C NMR APT spectrum of methyl 4-((2-chloroethyl)carbamoyl)cubane-1-carboxylate (**2**) in CDCl<sub>3</sub>.  
\* = CHCl<sub>3</sub>

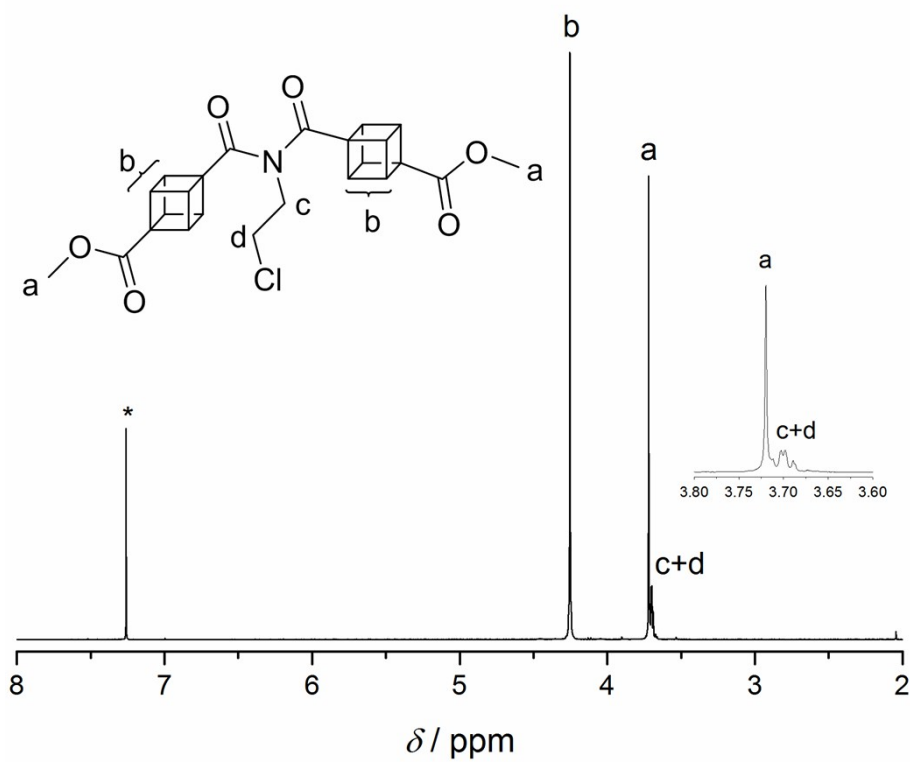

**Figure S3** <sup>1</sup>H NMR spectrum of **2'** in CDCl<sub>3</sub>. \* = CHCl<sub>3</sub>

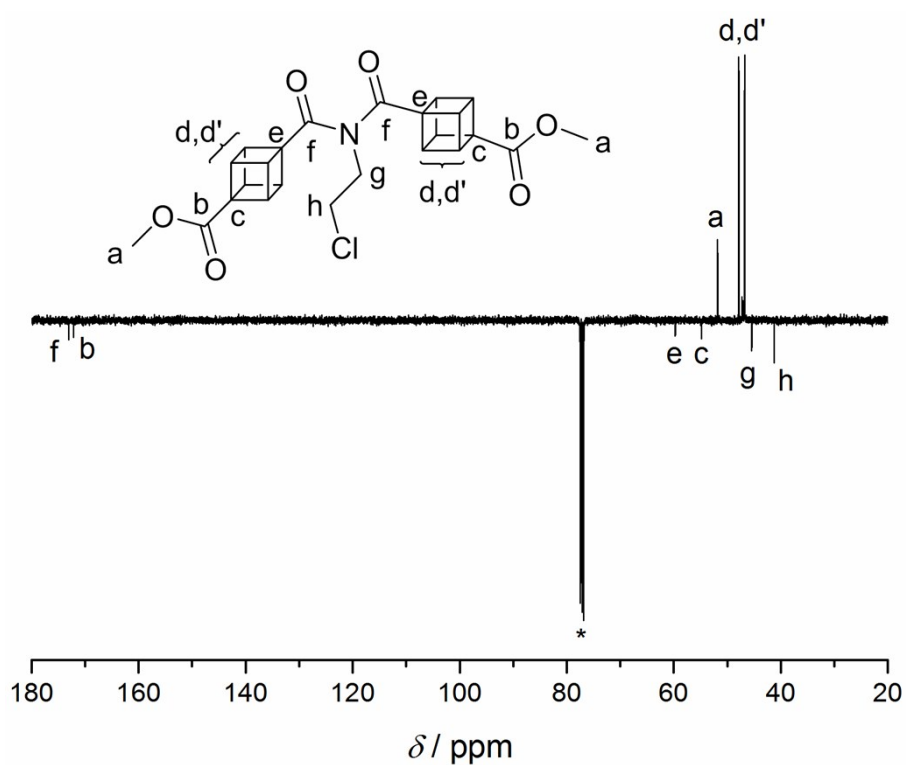

**Figure S4**  $^{13}\text{C}$  NMR APT spectrum of **2'** in  $\text{CDCl}_3$ . \* =  $\text{CHCl}_3$

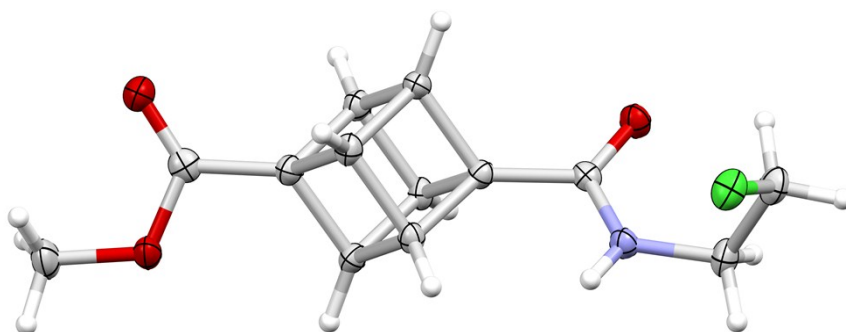

**Figure S5** Asymmetric unit of the crystal structure of methyl 4-((2-chloroethyl)carbamoyl)cubane-1-carboxylate (**2**) showing thermal displacement ellipsoids at the 50% probability level.

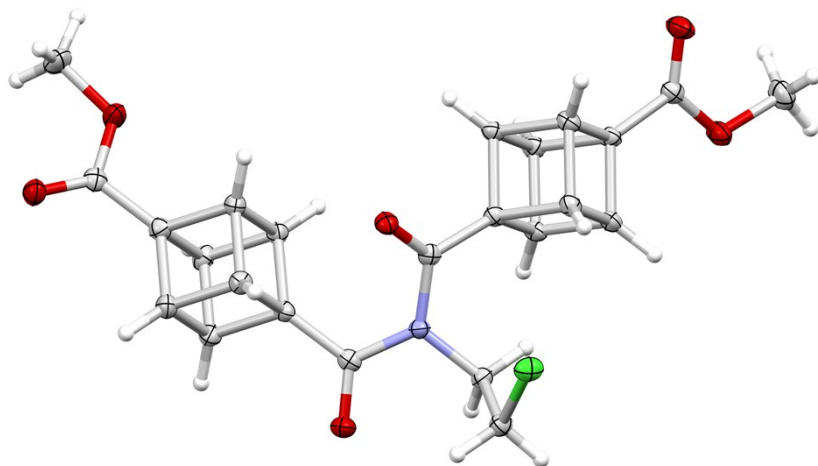

**Figure S6** Asymmetric unit of the crystal structure of **2'** showing thermal displacement ellipsoids at the 50% probability level.

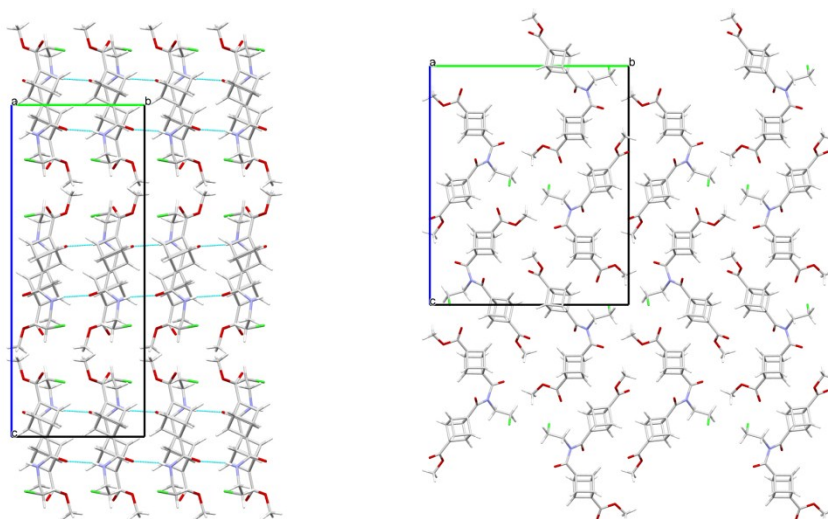

**Figure S7** Packing diagram of methyl 4-((2-chloroethyl)carbamoyl)cubane-1-carboxylate (**2**) (left) and **2'** (right).

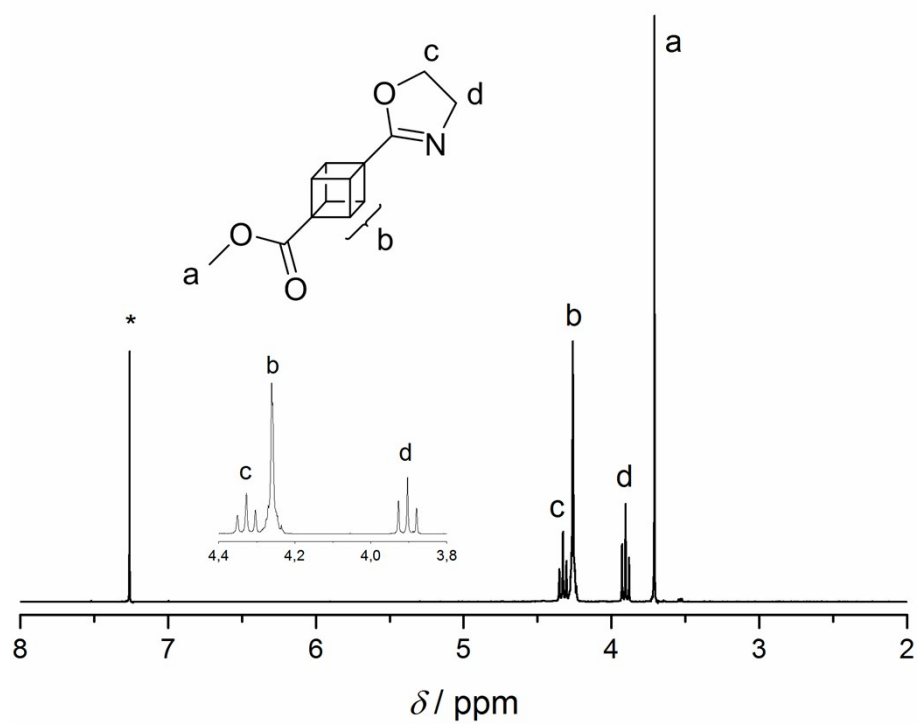

**Figure S8** <sup>1</sup>H NMR spectrum of **CubOx** in CDCl<sub>3</sub>. \* = CHCl<sub>3</sub>.

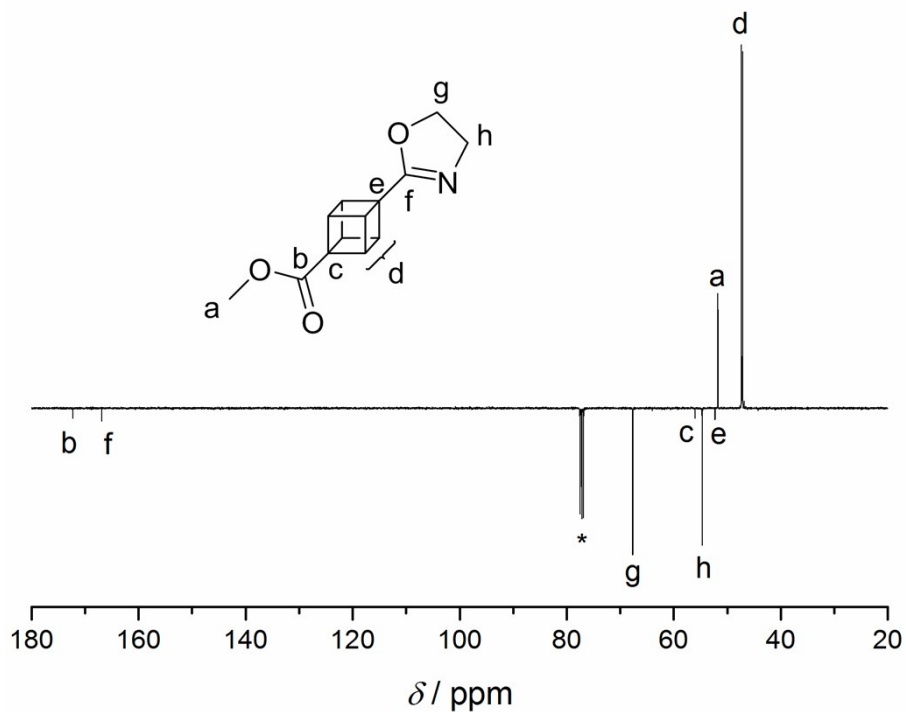

**Figure S9** <sup>13</sup>C NMR APT spectrum of **CubOx** in CDCl<sub>3</sub>. \* = CHCl<sub>3</sub>

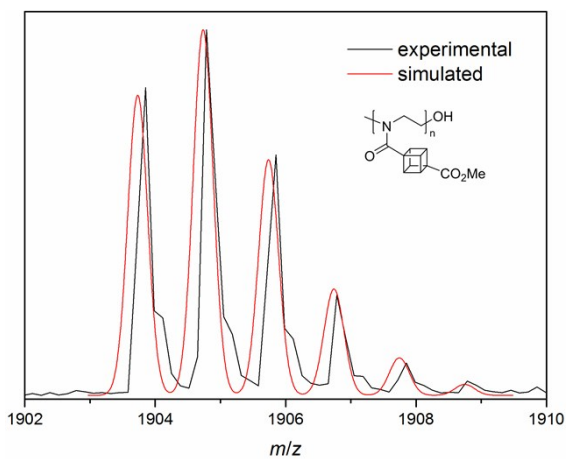

**Figure S10** Overlay of the measured (see Figure 2) and simulated isotopic pattern of the peak according to the above structure with  $n = 8$  ( $[M+Na]^+$ )

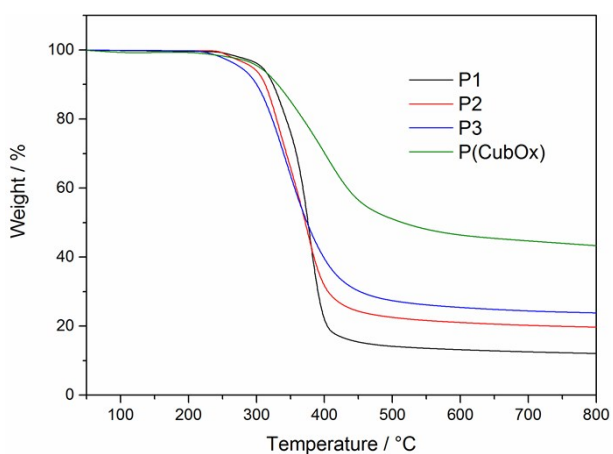

**Figure S11** TGA thermograms of P(CubOx) and the copolymers P1, P2 and P3.

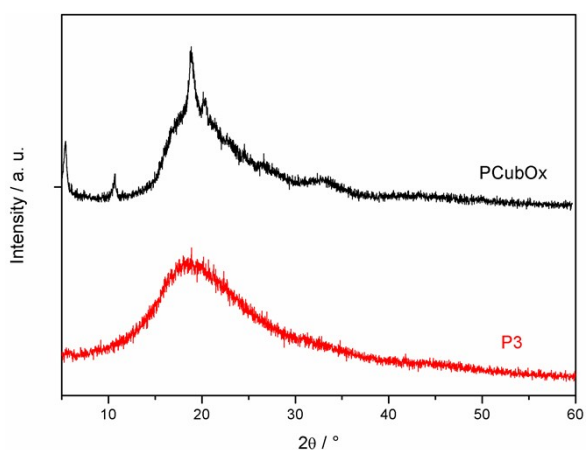

**Figure S12** XRD data of PCubOx and the copolymer P3.
